# Supplementary material
Source: PubMed Central journal article supplement (PMC10537742)
Supplement: aem.00979-23-s0001.pdf [file aem.00979-23-s0001.pdf]

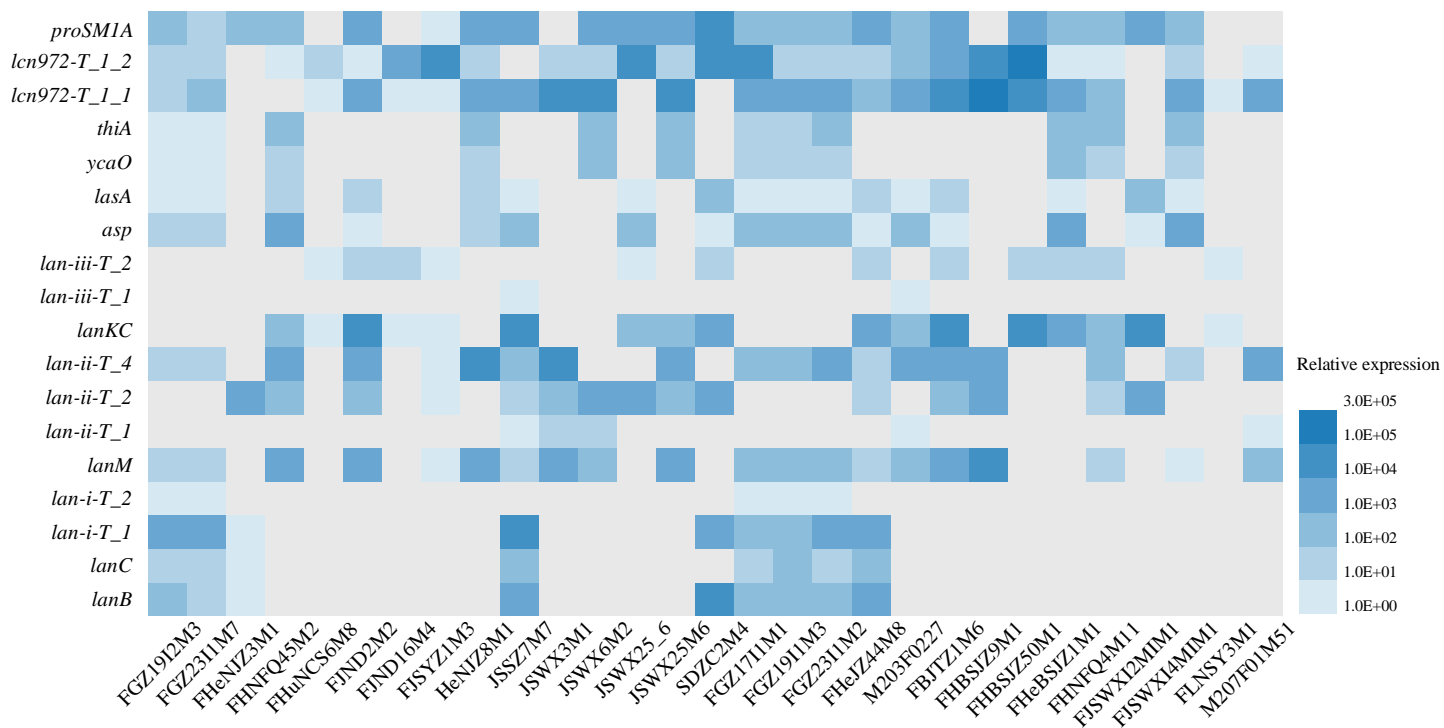

**Fig. S1** Transcription analysis of BGCs of the 36 *B. infantis* strains. The X-axis is the target gene whose specific name can be found in Table S2; the gray bottom indicates that the gene is not tested in the strain.
