# Supplementary material
Source: PubMed Central journal article supplement (PMC10537742)
Supplement: aem.00979-23-s0002.pdf [file aem.00979-23-s0002.pdf]

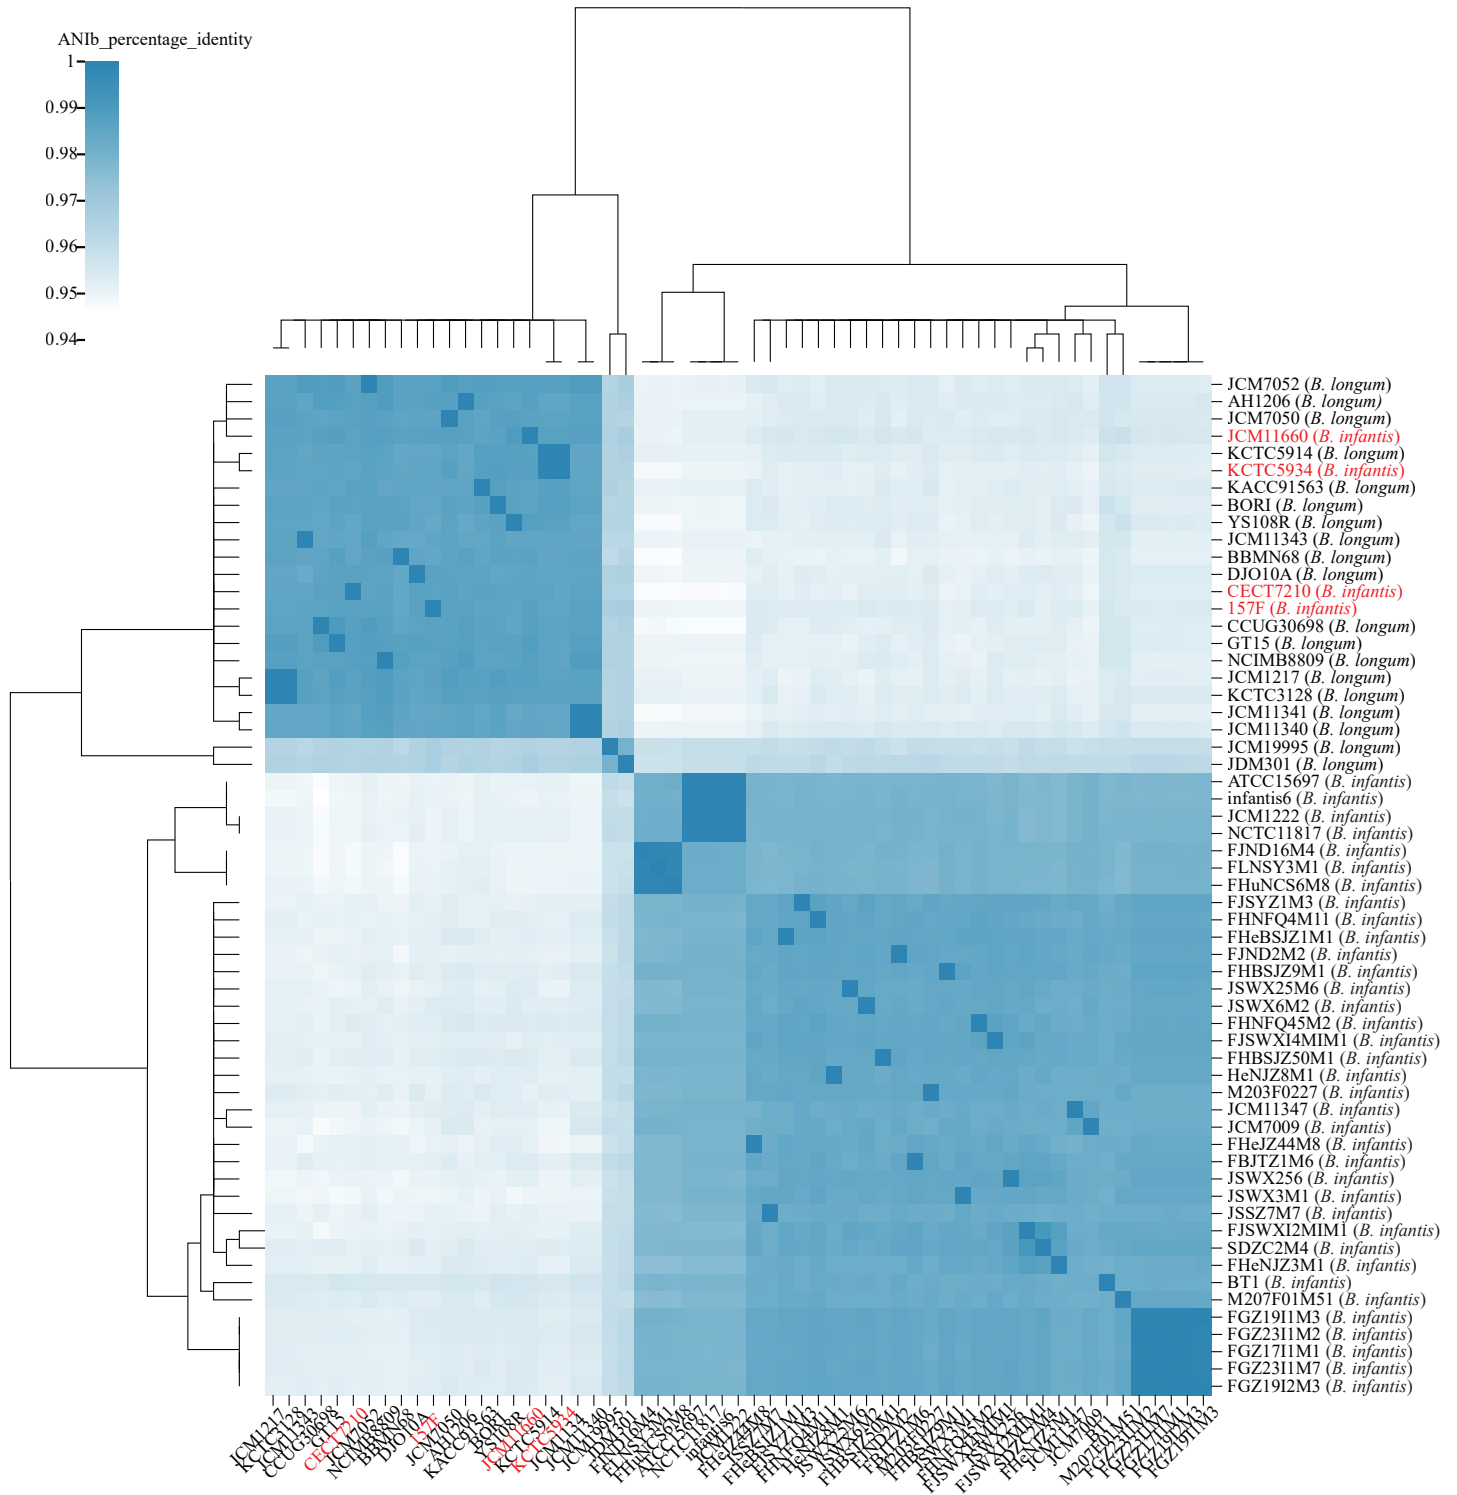

**Fig. S2** Heatmap and dendrogram of ANIb values of 59 *B. longum* genomes. Sequences of 40 genomes marked as *B. longum* subsp. *longum* (11 of which were downloaded from NCBI) and 19 genomes marked as *B. longum* subsp. *infantis* (11 of which were downloaded from NCBI) were distinguished by pairwise ANIb values. ANIb, average nucleotide identity blast. The red color code refers to the strains that may be incorrectly marked based on clustering results.
